# Supplementary material for: Control of neural crest multipotency by Wnt signaling and the Lin28/let-7 axis
Source: eLife journal article supplement (doi:10.7554/elife.40556), 2018-12-06
Supplement: supp [file elife-40556-supp-v1.zip]

Archive with 14 entries (14 files):
- elife_poa_e40556_Figure_2_source_data_1.xlsx
- elife_poa_e40556_Figure_1_figure_supplement_2.jpg
- elife_poa_e40556_Supplementary_File_1.docx
- elife_poa_e40556_Figure_1_figure_supplement_3.jpg
- elife_poa_e40556_Figure_5_figure_supplement_2.jpg
- elife_poa_e40556_Figure_1_figure_supplement_1.jpg
- elife_poa_e40556_Figure_4_source_data_1.xlsx
- elife_poa_e40556_Figure_5_source_data_1.xlsx
- elife_poa_e40556_Transparent_Reporting_File.pdf
- elife_poa_e40556_Figure_5_figure_supplement_1.jpg
- elife_poa_e40556_Figure_4_figure_supplement_1.jpg
- elife_poa_e40556_Figure_1_figure_supplement_4.jpg
- elife_poa_e40556_Figure_1_source_data_1.xlsx
- elife_poa_e40556_Figure_3_source_data_1.xlsx
