# Supplementary material for: Control of neural crest multipotency by Wnt signaling and the Lin28/let-7 axis
Source: eLife journal article supplement (doi:10.7554/elife.40556), 2018-12-06
Supplement: supp [file elife-40556-supp-v1.zip › elife_poa_e40556_Figure_1_source_data_1.xlsx]

## Sheet: source data figure1
Lin28 over-expression experiment: qPCR
	FoxD3		Pax7		Sox5		Ets1		Myc
Embryo					Control	Lin28 o/e	Control	Lin28 o/e	Control	Lin28 o/e
1	1	5.16293	1	1.26206	1	2.26441	1	5.03604	1	2.32697
2	1	1.80097	1	1.43426	1	1.57919	1	1.47843	1	2.78171
3	1	1.23385	1	1.88178	1	1.82897	1	1.52954	1	1.59838
4	1	5.80743	1	2.80644	1	1.72166	1	1.88168	1	1.47365
5	1	1.13221	1	1.55232	1	1.43084	1	1.40594	1	2.04517
6	1	2.12165	1	1.86106	1	1.53369	1	2.26633
Lin28 Morpholino experiment: qPCR
	Sox10		FoxD3
Embryo	Control	Lin28 Mo	Control	Lin28 Mo
1	1	0.00714132	1	0.0448213
2	1	0.0413799	1	0.742841
3	1	0.721944	1	0.615886
4	1	0.107896	1	0.680864
5	1	0.359861	1	0.385786
6	1	0.445985	1	0.49404
Lin28 CRISPR knockdown experiment : Quantitation of cell number
	FoxD3+ cells		Sox10+ cells
Section	Control	Lin28 gRNA	Control	Lin28 gRNA
1	10	3	21	12
2	19	11	15	10
3	17	6	16	12
4	11	5	22	14
5	15	3	36	14
6	10	4	17	9
7	11	5	20	10
8	12	5	28	10
9	10	4	10	6
10	14	10
