# Supplementary material for: Control of neural crest multipotency by Wnt signaling and the Lin28/let-7 axis
Source: eLife journal article supplement (doi:10.7554/elife.40556), 2018-12-06
Supplement: supp [file elife-40556-supp-v1.zip › elife_poa_e40556_Figure_2_source_data_1.xlsx]

## Sheet: Sheet1
Quantitatation of Neural crest derived colonies
CONTROL										LIN28
POTENCY	CHONROCYTES	GLIA	MELANOCYTES	NEURONS	MUSCLE	TOTAL				POTENCY	CHONROCYTES	GLIA	MELANOCYTES	NEURONS	MUSCLE	TOTAL
TRIPOTENT		5	1		3	9	GMS			MULTIPOTENT		14	18	2	4	38	GMNS
BIPOTENT		3			4	7	GS			TRIPOTENT		50	30		2	82	GMS
BIPOTENT		25	2			27	GM			TRIPOTENT		6	25		4	35	GMS
TRIPOTENT		4		4	2	10	GNS			MULTIPOTENT		20	14	5	8	47	GMNS
TRIPOTENT		30		4	4	38	GNS			MULTIPOTENT		21	8	2	6	37	GMNS
BIPOTENT		6		6		12	GS			BIPOTENT			14		7	21	MS
BIPOTENT		6			2	8	GS			MULTIPOTENT	2	9	18	3	9	41	GMNSC
MULTIPOTENT		10	8	3	3	24	GMNS			TRIPOTENT		11	8		3	22	GMS
BIPOTENT		3			4	7	GS			MULTIPOTENT		40	9	4	3	56	GMNS
						100
TRIPOTENT		14	2		1	17	GMS			TRIPOTENT		10	15		3	28	GMS
MULTIPOTENT		6	1	2	2	11	GMNS			MULTIPOTENT		4	18	10	3	35	GMNS
TRIPOTENT		1	2		10	13	GMS			MULTIPOTENT		8	14	4	8	34	GMNS
BIPOTENT		2			2	4	GS			TRIPOTENT		10	10		7	27	GMS
TRIPOTENT		6	2		2	10	GMS			MULTIPOTENT		5	20	2	7	34	GMNS
BIPOTENT		10	10			20	GM			MULTIPOTENT		9	9	1	2	21	GMNS
TRIPOTENT		25	4		5	34	GMS			TRIPOTENT		5	6		10	21	GMS
TRIPOTENT			10	5	4	19	GMS			MULTIPOTENT	1	7	25		10	43	GCMS
TRIPOTENT		10	6		7	23	GMS			MULTIPOTENT		5	5	4	6	20	GMNS
BIPOTENT			3		1	4	MS			MULTIPOTENT	4	14	10	4	9	41	GMNCS
BIPOTENT		3			6	9	GS			BIPOTENT		8	15			23	GM
TRIPOTENT		9	1		1	11	GMS			TRIPOTENT		6	7		5	18	GMS
TRIPOTENT	1	11			3	15	GCS			MULTIPOTENT	4	10	8		5	27	GCMS
	6.66667
TRIPOTENT		10	2		3	15	GMS			MULTIPOTENT	1	13		2	2	18	GCNS
TRIPOTENT	2	50			3	55	GCS			MULTIPOTENT		13	4	4	4	25	GNMS
TRIPOTENT		2	6		3	11	GMS			TRIPOTENT		4	4		4	12	GMS
MULTIPOTENT		3	1	1	2	7	GMNS
BIPOTENT		6			1	7	GS
										Tripotent	0.47
Tripotent	0.43									Bipotent	0.16
Bipotent	0.48									Multipotent	0.36
Multipotent	0.06
