# Supplementary material for: Control of neural crest multipotency by Wnt signaling and the Lin28/let-7 axis
Source: eLife journal article supplement (doi:10.7554/elife.40556), 2018-12-06
Supplement: supp [file elife-40556-supp-v1.zip › elife_poa_e40556_Figure_3_source_data_1.xlsx]

## Sheet: Sheet1
Lin28 knockdown experiment : qPCR for mature let-7
	let-7A		let-7B		let-7C
Embryo	Control	Lin28 Mo	Control	Lin28 Mo	Control	Lin28 Mo
1	1	2.21626	1	6.11531	1	2.50893
2	1	6.25125	1	2.09591	1	4.68578
3	1	8.88419	1	2.69973	1	3.8524
4	1	16.2842	1	1.38008	1	1.60638
5	1	7.40421	1	3.75648	1	4.66346
6	1	2.35546	1	3.05211	1	2.49511
let-7 mimic
	Sox10		Foxd3
Embryo
1	1	0.580892	1	0.545002
2	1	0.576286	1	0.637511
3	1	0.713761	1	0.699186
4	1	0.255782	1	0.620099
5	1	0.243414	1	0.338989
6	1	0.236124	1	0.568157
Epistatic experiments
Lin28 MO-Lin28 O/E
FOXD3	(INTENSITY)			SOX10	(INTENSITY)
CONTROL	MO/LIN28			CONTROL	MO/LIN28
25.854	30.468	1.17846		59.812	61.957	1.03586
42.146	42.975	1.01967		55.147	51.93	0.941665
65.911	63.396	0.961842		41.332	40.189	0.972346
54.547	54.71	1.00299		30.286	27.143	0.896223
28.539	28.647	1.00378		33.632	32.976	0.980495
Lin28 MO-mLin28 O/E
FOXD3	(INTENSITY)			SOX10	(INTENSITY)
CONTROL	MO/mLIN28			CONTROL	MO/mLIN28
5.479	3.239	0.591166		17.499	5.811	0.332076
10.323	6.138	0.594595		34.66	19.506	0.562781
10.452	7.398	0.707807		11.345	6.265	0.552226
6.378	3.68	0.576983		13.963	3.634	0.260259
Lin28 MO-let-7 sp
FOXD3	(INTENSITY)			SOX10	(INTENSITY)
CONTROL	MO/let-7 sp			CONTROL	MO/let-7 sp
30.358	32.175	1.05985		55.18	54.84	0.993838
32.908	31.1	0.945059		55.291	58.345	1.05524
31.063	31.131	1.00219		36.635	37.557	1.02517
53.069	52.778	0.994517		30.205	32.582	1.0787
				33.79	36.127	1.06916
Lin28 MO
FOXD3	(INTENSITY)			SOX10	(INTENSITY)
CONTROL	MO			CONTROL	MO
10.365	6.129	0.591317		13.764	6.855	0.498038
14.907	3.535	0.237137		16.064	8.318	0.517804
42.466	34.635	0.815594		29.14	13.026	0.447014
10.02	1.187	0.118463		21.22	13.331	0.628228
21.521	16.6	0.77134		11.037	6.455	0.584851
let-7 sponge over -expression experiment
	Foxd3		Pax7		Myc		Ets1		Lin28		Sox5
Embryo	Control	let-7 sponge	Control	let-7 sponge	Control	let-7 sponge	Control	let-7 sponge	Control	let-7 sponge	Control	let-7 sponge
1	1	2.10842	1	1.31265	1	1.77548	1	2.01671	1	2.01346	1	1.27637
2	1	1.7287	1	4.02821	1	1.22741	1	1.44261	1	1.23009	1	1.89902
3	1	1.56788	1	1.62631	1	1.43573	1	1.31932	1	1.25522	1	1.18641
4	1	1.52578	1	2.53765	1	2.43228	1	2.20054	1	1.26516	1	1.28459
5	1	1.35836	1	1.36821	1	1.21985	1	1.33096	1	1.2814	1	1.24021
6							1	1.34459			1	1.5883
