# Supplementary material for: Control of neural crest multipotency by Wnt signaling and the Lin28/let-7 axis
Source: eLife journal article supplement (doi:10.7554/elife.40556), 2018-12-06
Supplement: supp [file elife-40556-supp-v1.zip › elife_poa_e40556_Figure_4_source_data_1.xlsx]

## Sheet: Sheet1
NANOSTRING RAW COUNTS
Lin28 Loss-of-function				let-7 gain-of-function
GENE NAME	Control	Experimental		GENE NAME	Control	Experimental
ACAN	267.01	144.47		ACAN	164.33	212.43
ALX1	11.34	15.73		ALX1	10.82	6.64
ATF2	1054.73	640.2		ATF2	749.51	416.47
Axin1	104.13	38.03		Axin1	18.9	17.19
Axin2	1788.17	767.93		Axin2	1140.79	910.74
BLZF1	2529.5	1732.02		BLZF1	1305.84	1208
BNC2	44.9	34.99		BNC2	26.98	13.67
BRN3A	19.24	26.88		BRN3A	5.05	7.52
CDON	92.29	29.92		CDON	78.92	33.02
CNBP	55.76	55.26		CNBP	52.38	36.54
COL2A1	316.36	190.09		COL2A1	132.02	134.16
Cad6	1670.7	1741.14		Cad6	979.2	945.92
Cad7	206.79	77.56		Cad7	93.93	441.1
Cx43A1	3407.06	3959.24		Cx43A1	2012.21	2116.51
DLX3	53.79	48.17		DLX3	25.83	22.47
DLX5	365.72	315.8		DLX5	273.98	287.19
DMBX1	2655.85	2021.95		DMBX1	933.03	612.6
Dach1	121.9	188.06		Dach1	153.95	243.22
Dbx2	118.94	48.17		Dbx2	185.11	61.16
EBF1	15.29	40.06		EBF1	5.05	18.95
EEF1A1	20257.3	21493.2		EEF1A1	11436.3	11448.6
EGFP_coding	422.97	218.48		EGFP_coding	243.97	46.21
EN1	92.29	105.95		EN1	63.92	93.7
ENSGALG00000003424	475.29	436.43		ENSGALG00000003424	331.69	288.07
ERNI	1146.54	1065.98		ERNI	632.94	684.71
Ecad	633.23	393.86		Ecad	149.33	100.74
Eya1	26.15	196.17		Eya1	29.29	29.5
Eya2	571.04	449.61		Eya2	272.83	129.76
FEZF1	19.24	8.63		FEZF1	9.67	1.36
FOXD3	3562.03	1330.57		FOXD3	2108.01	981.98
Foxl	758.6	363.44		Foxl	1455.89	609.96
GATA3	25.16	60.33		GATA3	17.75	17.19
GBX2	133.75	643.24		GBX2	41.99	32.14
Gapdh	26852.3	24280		Gapdh	14792.7	13352.7
HPRT1	306.49	400.95		HPRT1	188.57	179.89
Hes5	227.52	259.03		Hes5	123.94	151.75
Hes6	180.14	186.04		Hes6	285.52	325.89
ID2	3753.54	3127.96		ID2	3117.94	2452.47
ID4	72.54	30.93		ID4	26.98	16.31
IRX1	104.13	118.12		IRX1	160.87	93.7
Id3	1	2.55		Id3	1.59	8.4
Integrinb1	118.94	115.07		Integrinb1	156.25	158.79
Itegrina5	4.43	3.56		Itegrina5	1.15	1
LHX1	7.39	154.61		LHX1	1.59	9.27
LHX5	213.7	40.06		LHX5	22.37	269.6
LHX9	312.42	341.14		LHX9	171.26	164.94
LMO4	245.29	355.33		LMO4	95.08	87.55
LOC396047	4.43	38.03		LOC396047	7.36	11.03
LOC416710	404.22	408.05		LOC416710	208.19	222.99
LTK	243.32	153.6		LTK	74.3	98.1
Lbh	174.22	229.63		Lbh	138.94	131.52
Lef1	1181.09	1352.87		Lef1	702.19	687.35
Lin28A	1118.9	682.78		Lin28A	907.64	517.61
MEF2C	307.48	199.22		MEF2C	256.67	207.16
MSX1	1699.33	1209.93		MSX1	740.28	554.55
MSX2	314.39	204.28		MSX2	185.11	102.5
MYB	107.09	156.64		MYB	70.84	65.56
MYC	165.33	114.06		MYC	152.79	84.91
MYCN	1730.92	1113.62		MYCN	1107.32	812.24
MYEF2	783.27	573.29		MYEF2	427.49	627.55
NKRF	812.89	675.68		NKRF	555.61	485.07
NR1D2	1	25.86		NR1D2	1.15	3.12
Ncad	823.75	584.44		Ncad	415.95	499.14
ONECUT2	2182.03	895.67		ONECUT2	1092.31	872.92
Otx2	1474.26	1444.11		Otx2	795.68	911.62
PAX3	168.3	223.55		PAX3	129.71	93.7
PRRX1_CHICK	307.48	208.34		PRRX1_CHICK	209.35	194.84
Pax2	350.91	254.97		Pax2	564.84	565.98
Pax6	287.74	309.72		Pax6	240.51	178.13
RCOR1	238.38	623.98		RCOR1	51.22	29.5
RXRG	27.14	12.68		RXRG	8.52	13.67
Rac1	95.25	136.36		Rac1	59.3	55.89
RhoA	246.28	213.41		RhoA	616.78	356.67
RhoB	373.62	494.22		RhoB	157.41	109.54
SDHA	629.28	762.86		SDHA	384.79	386.57
SIX1	93.27	431.37		SIX1	70.84	71.72
SNAI2	2186.97	1430.93		SNAI2	3381.1	1400.61
SOX10	264.05	72.5		SOX10	234.74	116.57
SOX2	374.6	410.08		SOX2	612.16	939.76
SOX3	500.96	544.91		SOX3	469.04	677.68
SOX8	422.97	176.91		SOX8	486.36	238.82
Six3	1867.14	1421.81		Six3	1212.35	989.01
Six4	280.83	347.22		Six4	173.57	186.93
Sox5	2169.2	729.41		Sox5	2289.22	1403.25
TEF	623.36	549.98		TEF	331.69	342.6
TFAP2A	2258.04	1406.6		TFAP2A	1821.77	1058.49
TFAP2B	8995.18	9805.58		TFAP2B	3838.17	3691.65
TFAP2C	1259.07	1313.33		TFAP2C	781.83	755.07
TFRC	475.29	525.65		TFRC	179.34	208.04
TNIP1	1419.97	838.9		TNIP1	626.01	264.32
TWIST1	7.39	273.22		TWIST1	3.9	12.79
Tcf1/Hnf1	180.14	175.9		Tcf1/Hnf1	123.94	179.01
ZIC1	151.51	145.49		ZIC1	223.2	586.21
Zic2	480.23	343.17		Zic2	293.6	205.4
Zic3	6.41	1.53		Zic3	1.59	1
mRFP1_coding	2573.92	2158.81		mRFP1_coding	1738.67	2197.42
NEG_A	1.49	2.51		NEG_A	1.38	2.55
NEG_B	1	1		NEG_B	1	1
NEG_C	1	1		NEG_C	1	1
NEG_D	1	1		NEG_D	1	1
NEG_E	1.49	4.51		NEG_E	6.38	3.55
NEG_F	1.49	1		NEG_F	1	1
NEG_G	1	1		NEG_G	1	1
NEG_H	1	1		NEG_H	1	1
POS_A	43328.5	44549.5		POS_A	37658.4	36449.6
POS_B	9883.49	10235.5		POS_B	8364.38	8294.55
POS_C	2426.49	2655.51		POS_C	2116.38	1952.55
POS_D	762.49	778.51		POS_D	673.38	626.55
POS_E	151.49	137.51		POS_E	145.38	116.55
POS_F	36.49	38.51		POS_F	25.38	45.55
Nanostring verification : Lin28 LOF
		Pax7		Tfap2bB		Sox9		Ets1		Myc		Sox5
Embryo	Control	Lin28 Mo	Control	Lin28 Mo	Control	Lin28 Mo	Control	Lin28 Mo	Control	Lin28 Mo	Control	Lin28 Mo
1	1	0.077866	1	0.701002	1	0.813717	1	0.585507	1	0.338611	1	0.579646
2	1	0.29561	1	0.724041	1	0.546903	1	0.406266	1	0.523123	1	0.398168
3	1	0.79773	1	0.589425	1	0.743775	1	0.765108	1	0.570105	1	0.32669
4	1	0.215593	1	0.215133	1	0.272767	1	0.421119	1	0.634901	1	0.476456
5	1	0.445325	1	0.0709122	1	0.193182	1	0.74165	1	0.800466	1	0.44524
6	1	0.412314	1	0.477425	1	0.422093	1	0.709608	1	0.573441
Nanostring verification : let-7 GOF
		ETS1		cMYC		SOX5		PAX7		SOX9		Tfap2b
Embryo	Control	let-7 mimic	Control	let-7 mimic	Control	let-7 mimic	Control	let-7 mimic	Control	let-7 mimic	Control	let-7 mimic
1	1	0.572821	1	0.691452	1	0.417437	1	0.344362	1	0.808035	1	0.58994
2	1	0.761018	1	0.35421	1	0.627693	1	0.857534	1	0.865575	1	0.569
3	1	0.598582	1	0.513502	1	0.572104	1	0.1	1	0.438863	1	0.462632
4	1	0.259546	1	0.777789	1	0.585623	1	0.627328	1	0.792912	1	0.540524
5	1	0.82479	1	0.584238	1	0.393638	1	0.455413	1	0.726346
6	1	0.603351			1	0.519299	1	0.476927
CRISPR Targeting of UTRs
			Foxd3				Pax7
Embryo	Control	Foxd3-UTR gRNA1	Control	Foxd3-UTR gRNA2	Control	Pax7-UTR gRNA1	Control	Pax7-UTR gRNA2
1	1	1.35587	1	0.858444	1	1.38551	1	1.28005
2	1	1.40487	1	0.940661	1	1.84991	1	1.23464
3	1	1.34746	1	1.1021	1	1.44838	1	1.19137
4	1	1.2505	1	0.48596	1	1.56127	1	2.82296
5	1	1.59831	1	0.250868			1	2.49515
6	1	2.01174
