# Supplementary material for: Control of neural crest multipotency by Wnt signaling and the Lin28/let-7 axis
Source: eLife journal article supplement (doi:10.7554/elife.40556), 2018-12-06
Supplement: supp [file elife-40556-supp-v1.zip › elife_poa_e40556_Figure_5_source_data_1.xlsx]

## Sheet: Sheet1
Wnt signaling knockdown
	Lin28		Lin28E1-GFP		let-7A		let-7c
Embryo	Control	Wnt knockdown	Control	Wnt knockdown	Control	Wnt knockdown	Control	Wnt knockdown
1	1	0.295945	1	0.580216	1	1.26042	1	1.07638
2	1	0.74508	1	0.208079	1	2.12568	1	4.97806
3	1	0.554891	1	0.538818	1	2.3415	1	3.85983
4	1	0.266489	1	0.479681	1	1.46997	1	2.3
5	1	0.59814	1	0.0503979	1	1.9	1	3.05357
6	1	0.537601	1	0.538818
Wnt signaling over-expression
	Lin28		FoxD3		Pax7			Axin2	let-7 sensor-mcherry
Embryo	Control	Wnt o/e	Control	Wnt o/e	Control	Wnt o/e	Control	Wnt o/e	Control	Wnt o/e
1	1	1.6	1	1.67	1	2.6	1	1.57746	1	3.03826
2	1	1.4	1	2.16671	1	2.00544	1	2.36229	1	2.82211
3	1	1.96328	1	2.09689	1	1.6835	1	3.79369	1	1.85589
4	1	1.13668	1	2.24236	1	2.87167	1	2.41797	1	2.51527
5	1	1.52499	1	2.04399	1	1.13684
Single cell measurements:
Neural crest cell	Distance (a.u)	Let7 sensor intensity (a.u)		Distance (a.u)	β-catenin (a.u)
1	39.292	46.862		39.292	15.78
2	61.782	26.824		61.782	7.598
3	66.22	45.746		66.22	13.63
4	27.143	99.574		27.143	72.42
5	27.746	76.926		27.746	71.925
6	43.902	34.63		43.902	5.228
7	66.177	82.916		66.177	15.932
8	56.052	44.083		56.052	1.635
9	76.215	62.568		76.215	5.158
10	76.517	41.769		76.517	6.073
11	75.224	55.09		75.224	3.484
12	75.009	21.402		75.009	5.545
13	74.923	51.253		74.923	2.176
14	74.406	23.326		74.406	1.164
15	79.576	24.652		79.576	3.84
16	76.818	32.824		76.818	3.035
17	76.301	26.722		76.301	2.407
18	79.576	26.729		79.576	4.159
19	83.367	16.797		83.367	3.895
20	39.551	63.151		39.551	12.688
21	53.812	56.564		53.812	1.202
22	66.134	48.443		66.134	4.046
23	69.882	35.784		69.882	35.784
24	58.034	22.692		58.034	22.692
25	75.612	25.577		75.612	25.577
26	35.372	85.641		35.372	34.483
27	59.326	20.64		59.326	4.617
28	56.914	21.963		56.914	5.021
29	55.923	33.487		55.923	2.63
30	60.404	25.549		60.404	6.01
31	59.24	25.8		59.24	5.351
32	69.193	41.3		69.193	6.437
33	71.648	21.766		71.648	8.183
34	74.233	23.844		74.233	5.532
35	68.848	14.296		68.848	2.585
36	68.805	17.557		68.805	1.667
37	71.95	27.702		71.95	4.573
38	75.741	22.952		75.741	3.152
39	75.914	12.534		75.914	1.578
40	75.569	64.31		75.569	2.868
41	76.474	19.865		76.474	3.233
42	77.206	34.515		77.206	2.056
43	74.492	28.148		74.492	1.807
44	36.923	143.713		36.923	28.799
45	59.585	15.752		59.585	3.417
46	60.188	18.477		60.188	0.966
47	62.299	28.025		62.299	2.434
48	71.907	49.43		71.907	12.761
49	72.209	44.068		72.209	3.767
50	75.138	48.588		75.138	7.048
51	73.803	13.111		73.803	6.318
52	60.49	11.127		60.49	0.821
53	60.791	8.58		60.791	1.104
54	78.456	17.516		78.456	2.392
55	69.408	13.488		69.408	1.542
56	69.193	15.477		69.193	1.487
57	69.796	15.547		69.796	1.933
58	37.224	148.883		37.224	9.897
59	58.465	23.735		58.465	3.6
60	37.311	69.688		37.311	5.031
61	36.923	59.878		36.923	3.902
62	39.163	40.965		39.163	4.669
63	41.145	31.045		41.145	1.244
64	53.639	54.934		53.639	4.453
65	57.991	33.555		57.991	3.682
66	56.095	79.819		56.095	7.413
67	54.975	81.296		54.975	2.935
68	59.671	32.85		59.671	8.723
69	37.569	123.286		37.569	11.972
70	64.712	58.93		64.712	13.251
71	64.798	83.03		64.798	7.58
72	63.85	37.713		63.85	5.746
73	65.617	28.648		65.617	3.734
