# Supplementary figures and images for: Control of neural crest multipotency by Wnt signaling and the Lin28/let-7 axis
Source: eLife journal article supplement (doi:10.7554/elife.40556), 2018-12-06

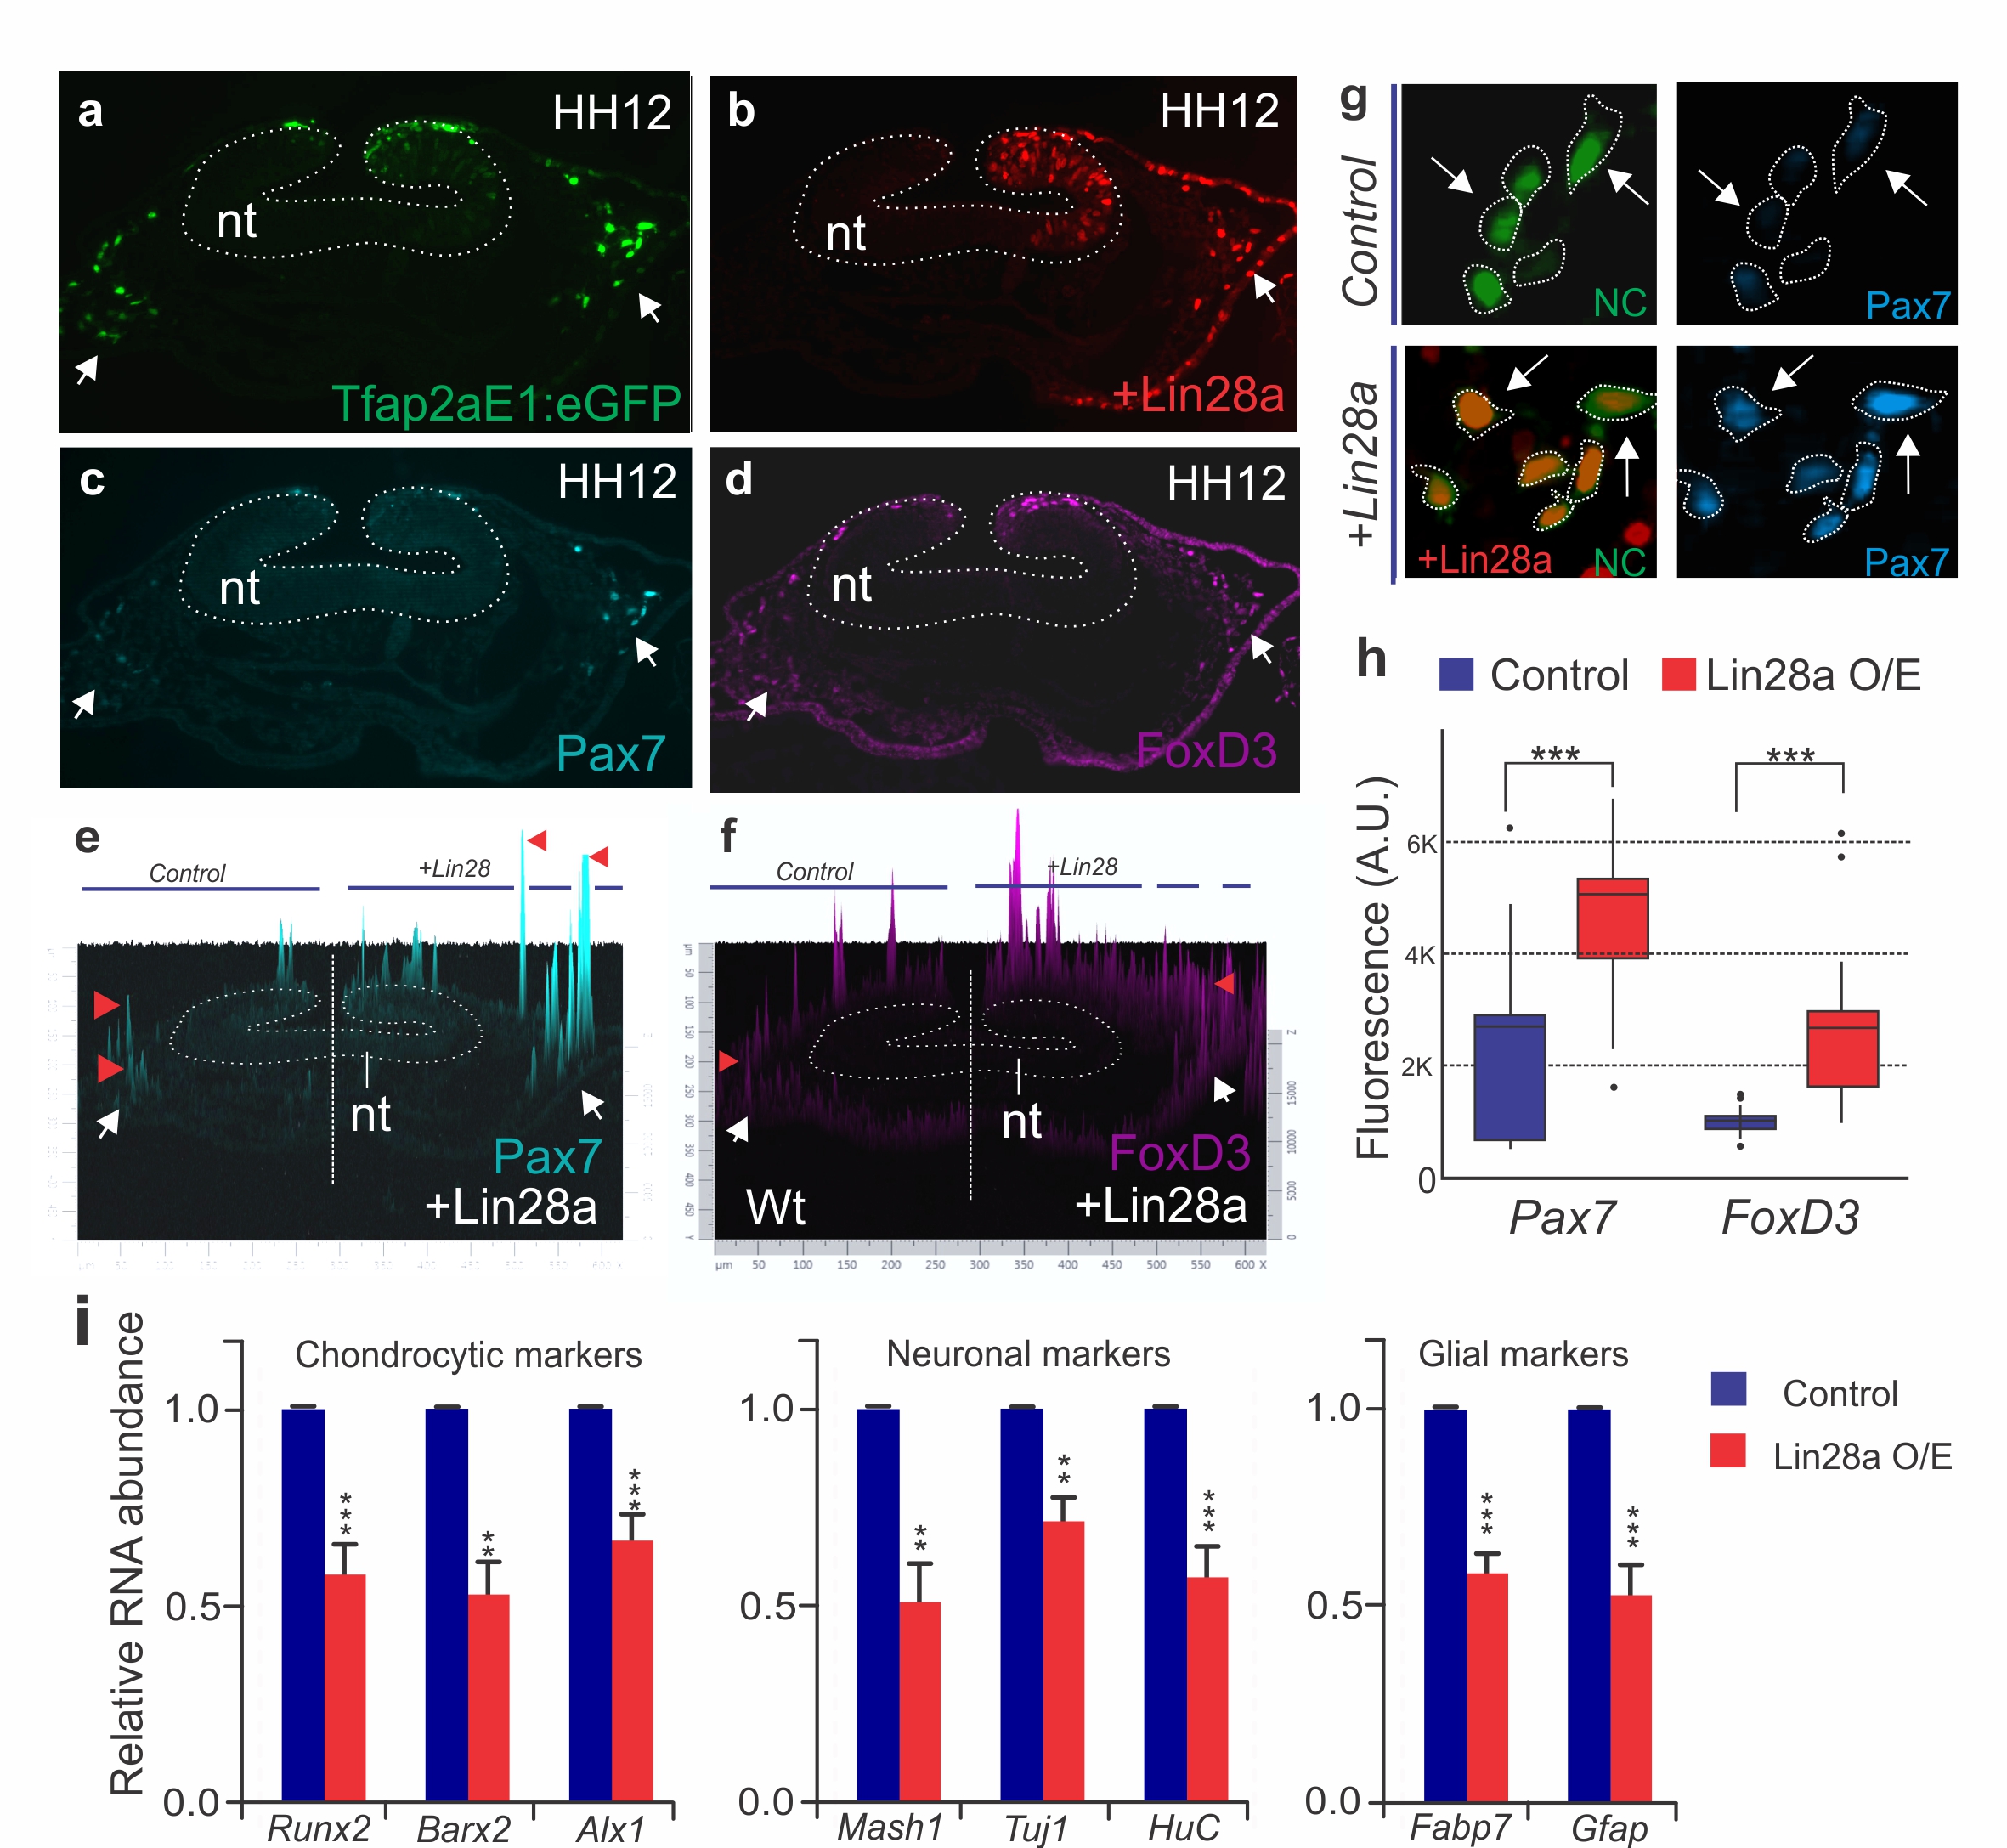

Supplement: supp [file elife-40556-supp-v1.zip › elife_poa_e40556_Figure_1_figure_supplement_2.jpg]

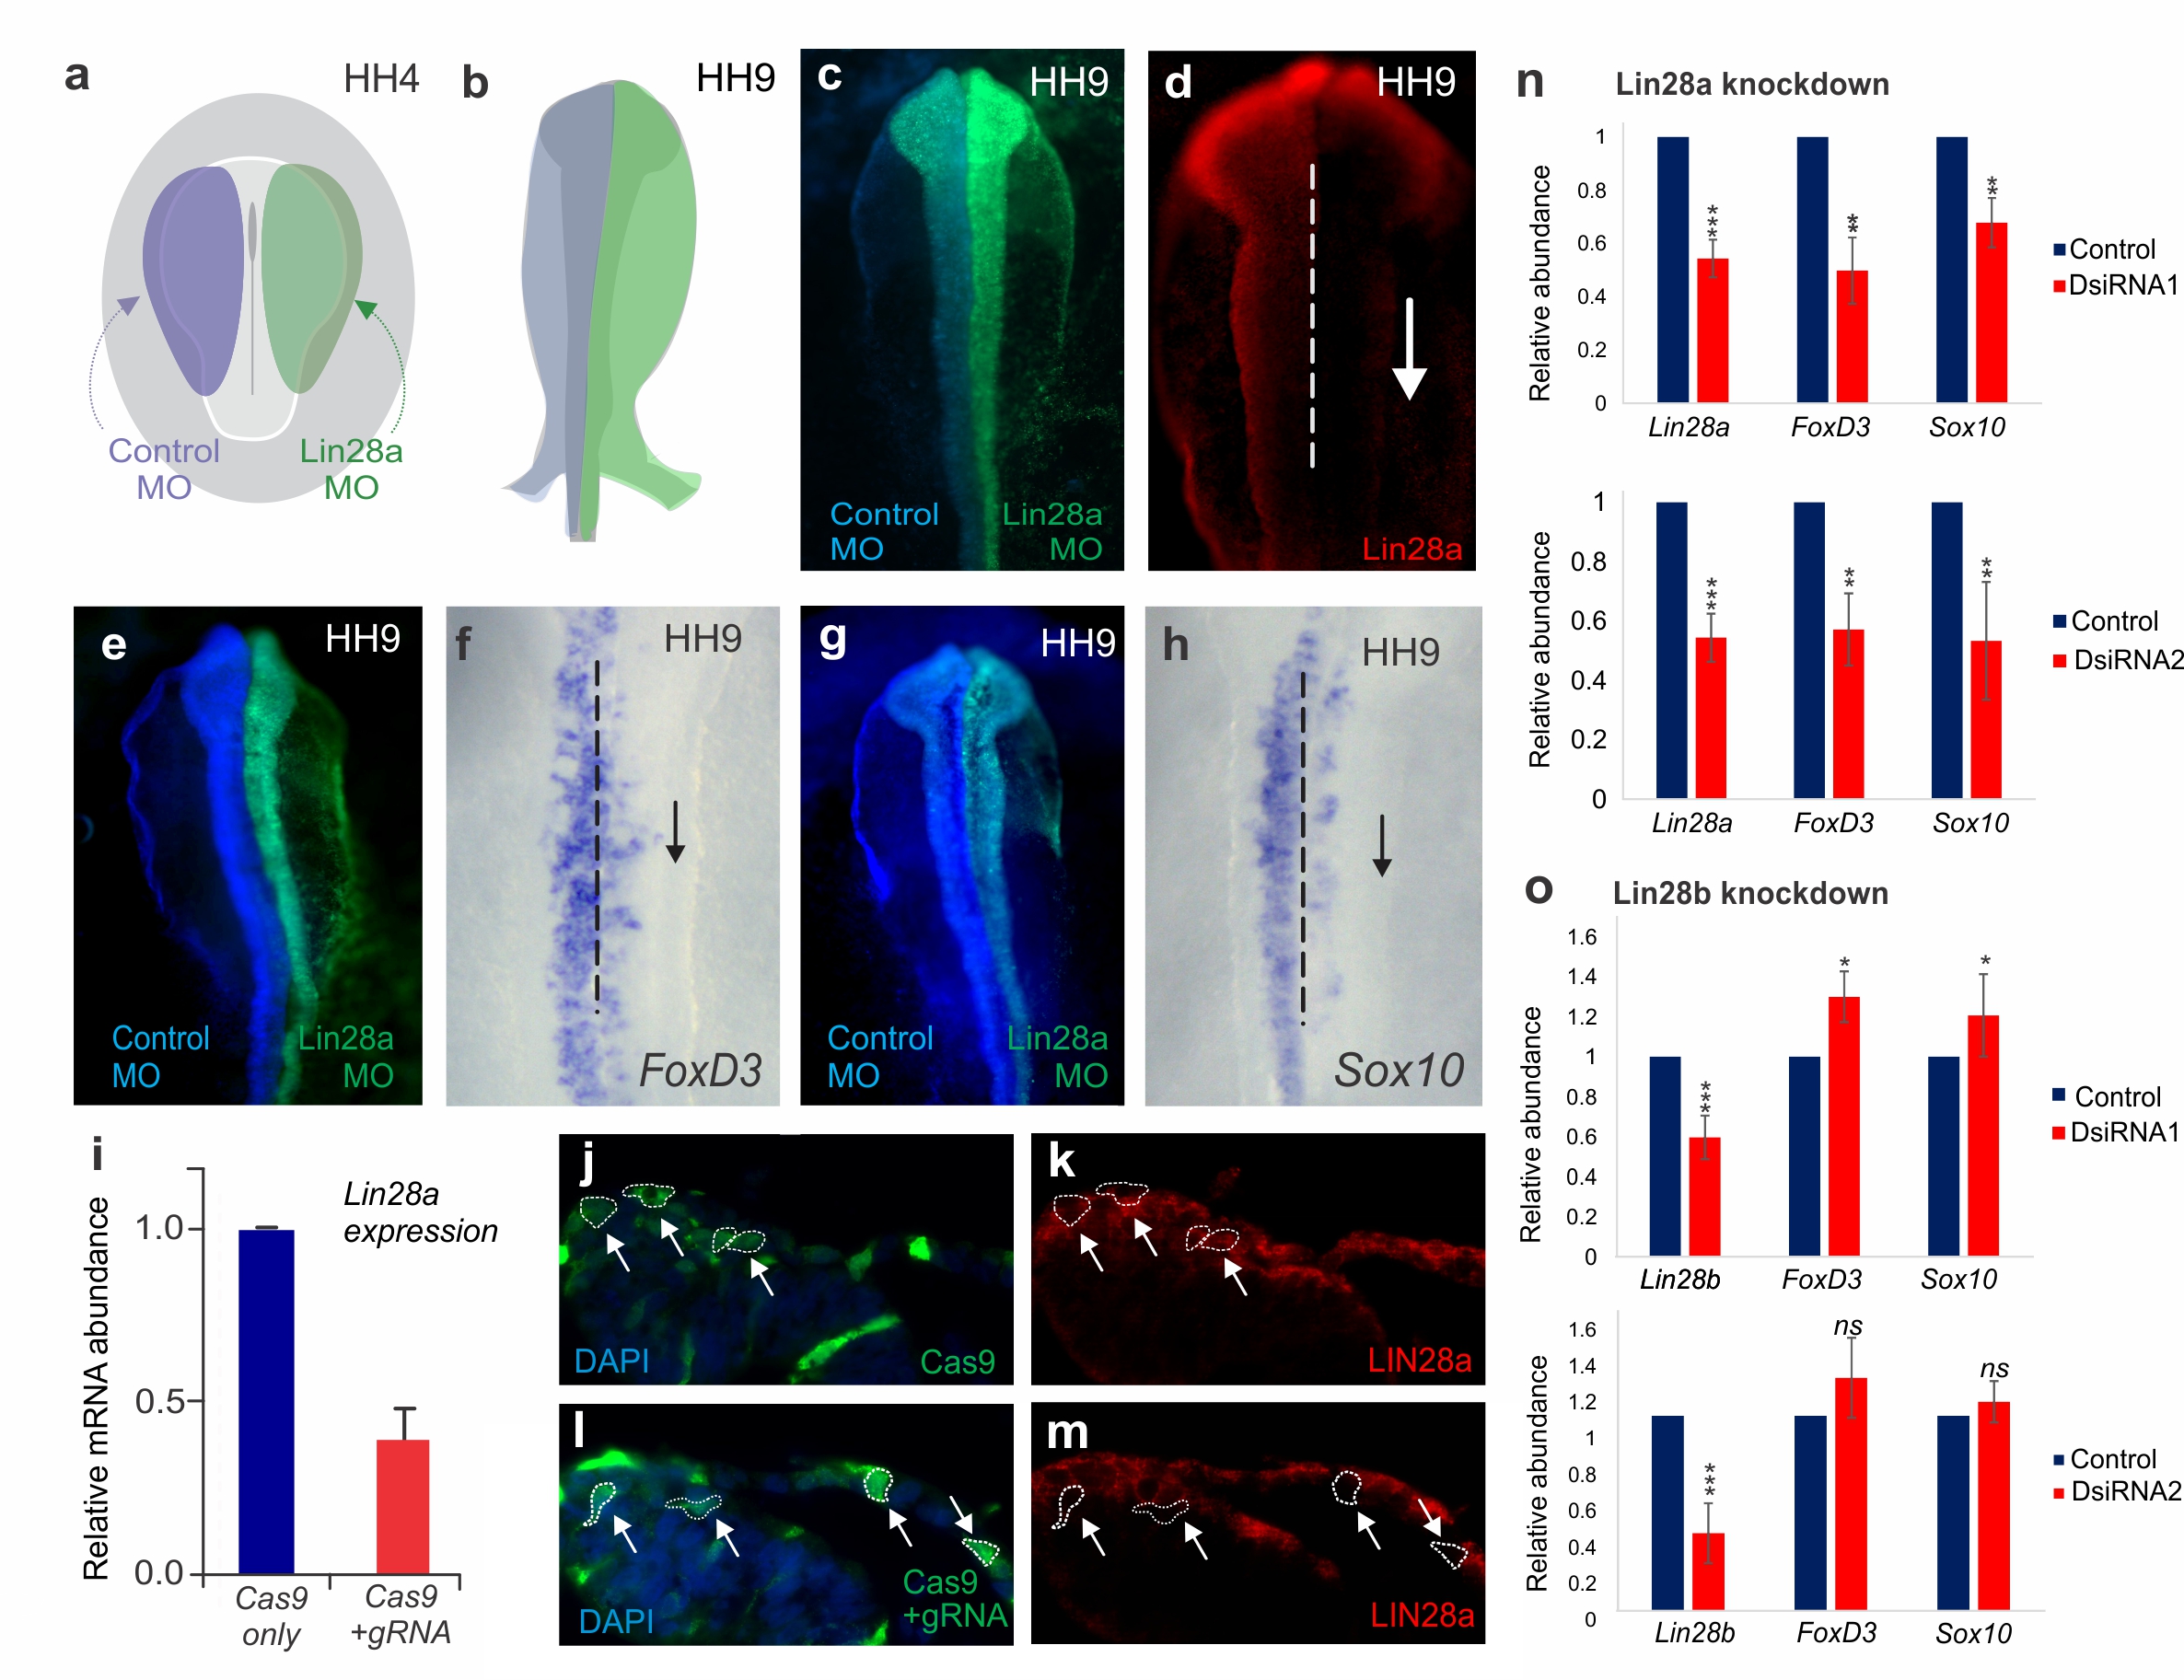

Supplement: supp [file elife-40556-supp-v1.zip › elife_poa_e40556_Figure_1_figure_supplement_3.jpg]

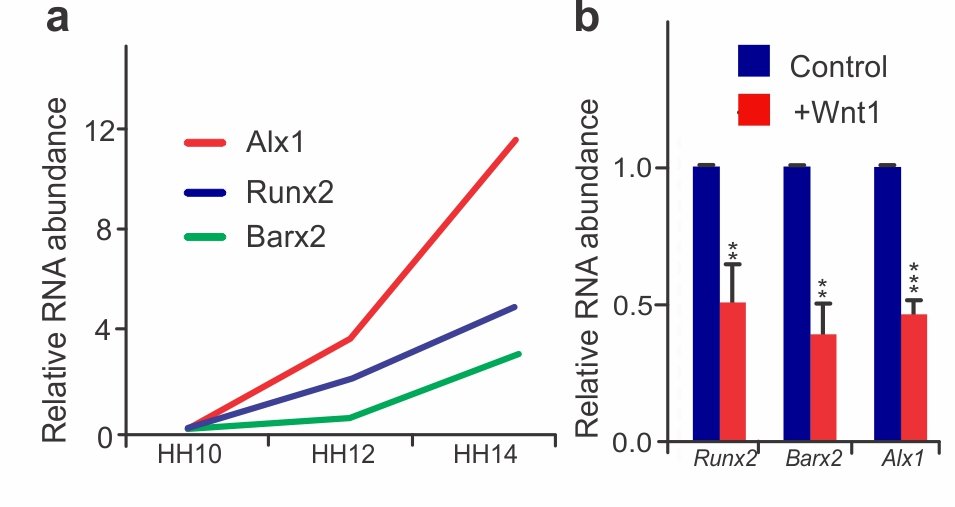

Supplement: supp [file elife-40556-supp-v1.zip › elife_poa_e40556_Figure_5_figure_supplement_2.jpg]

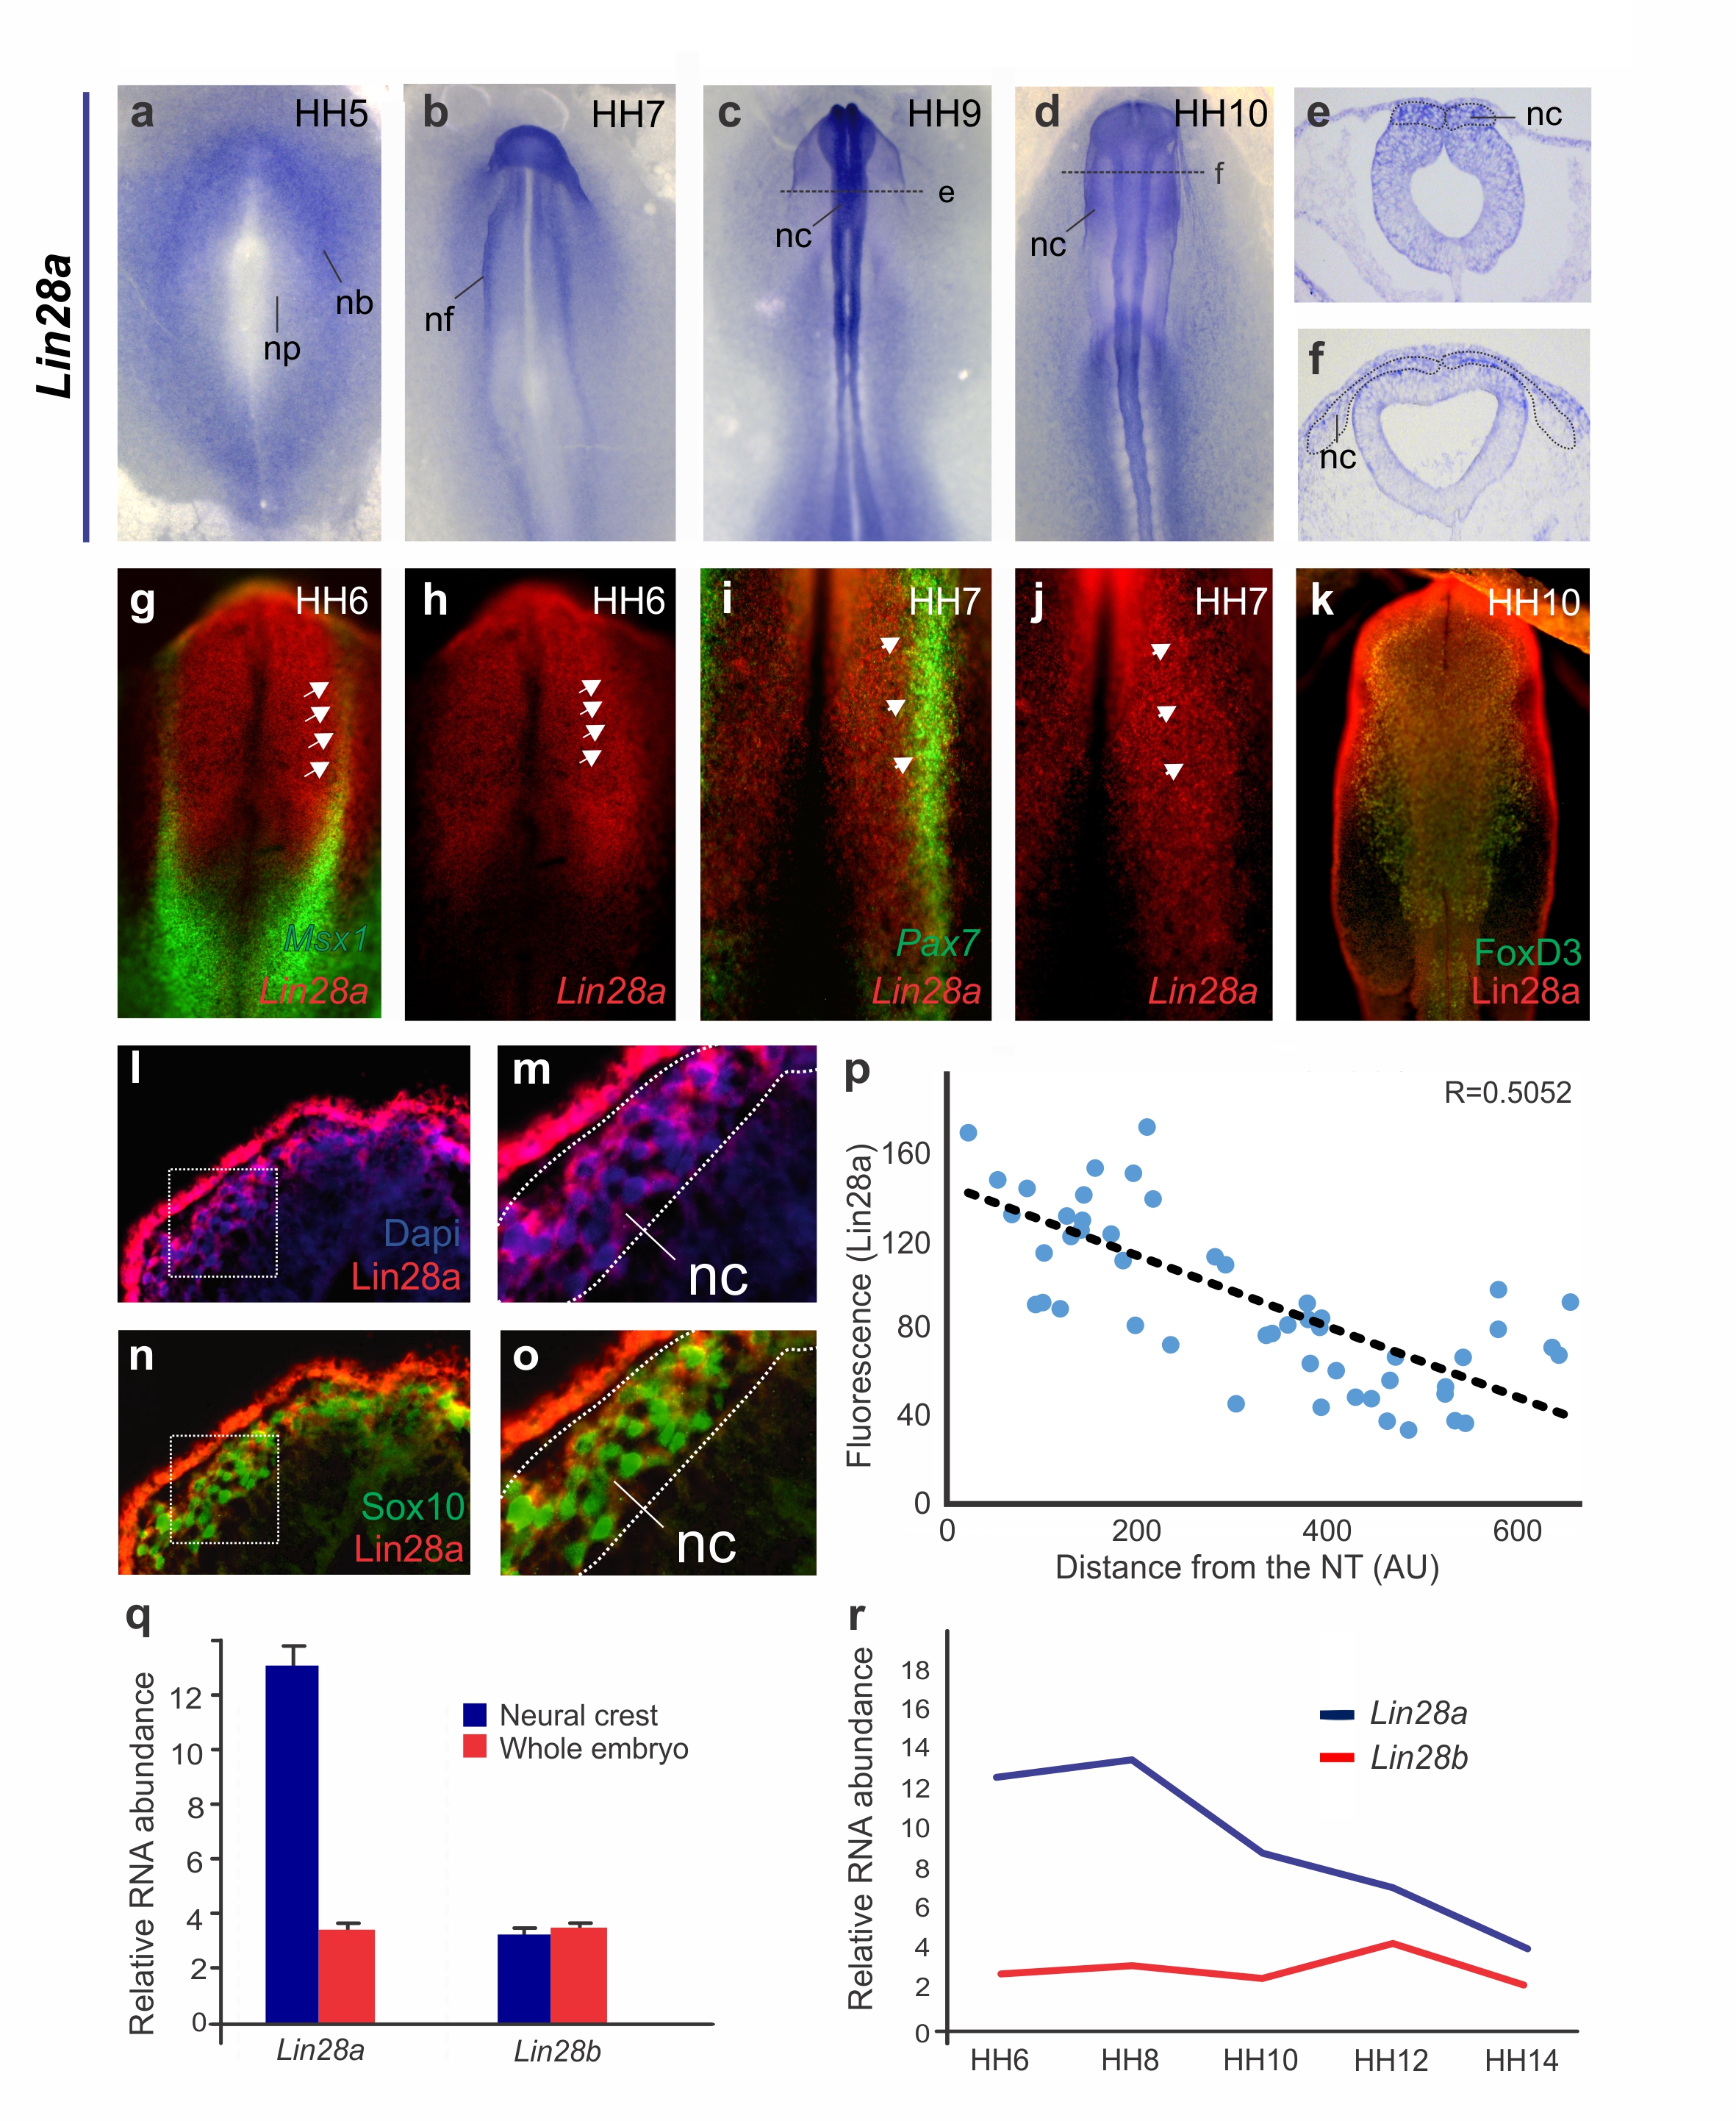

Supplement: supp [file elife-40556-supp-v1.zip › elife_poa_e40556_Figure_1_figure_supplement_1.jpg]

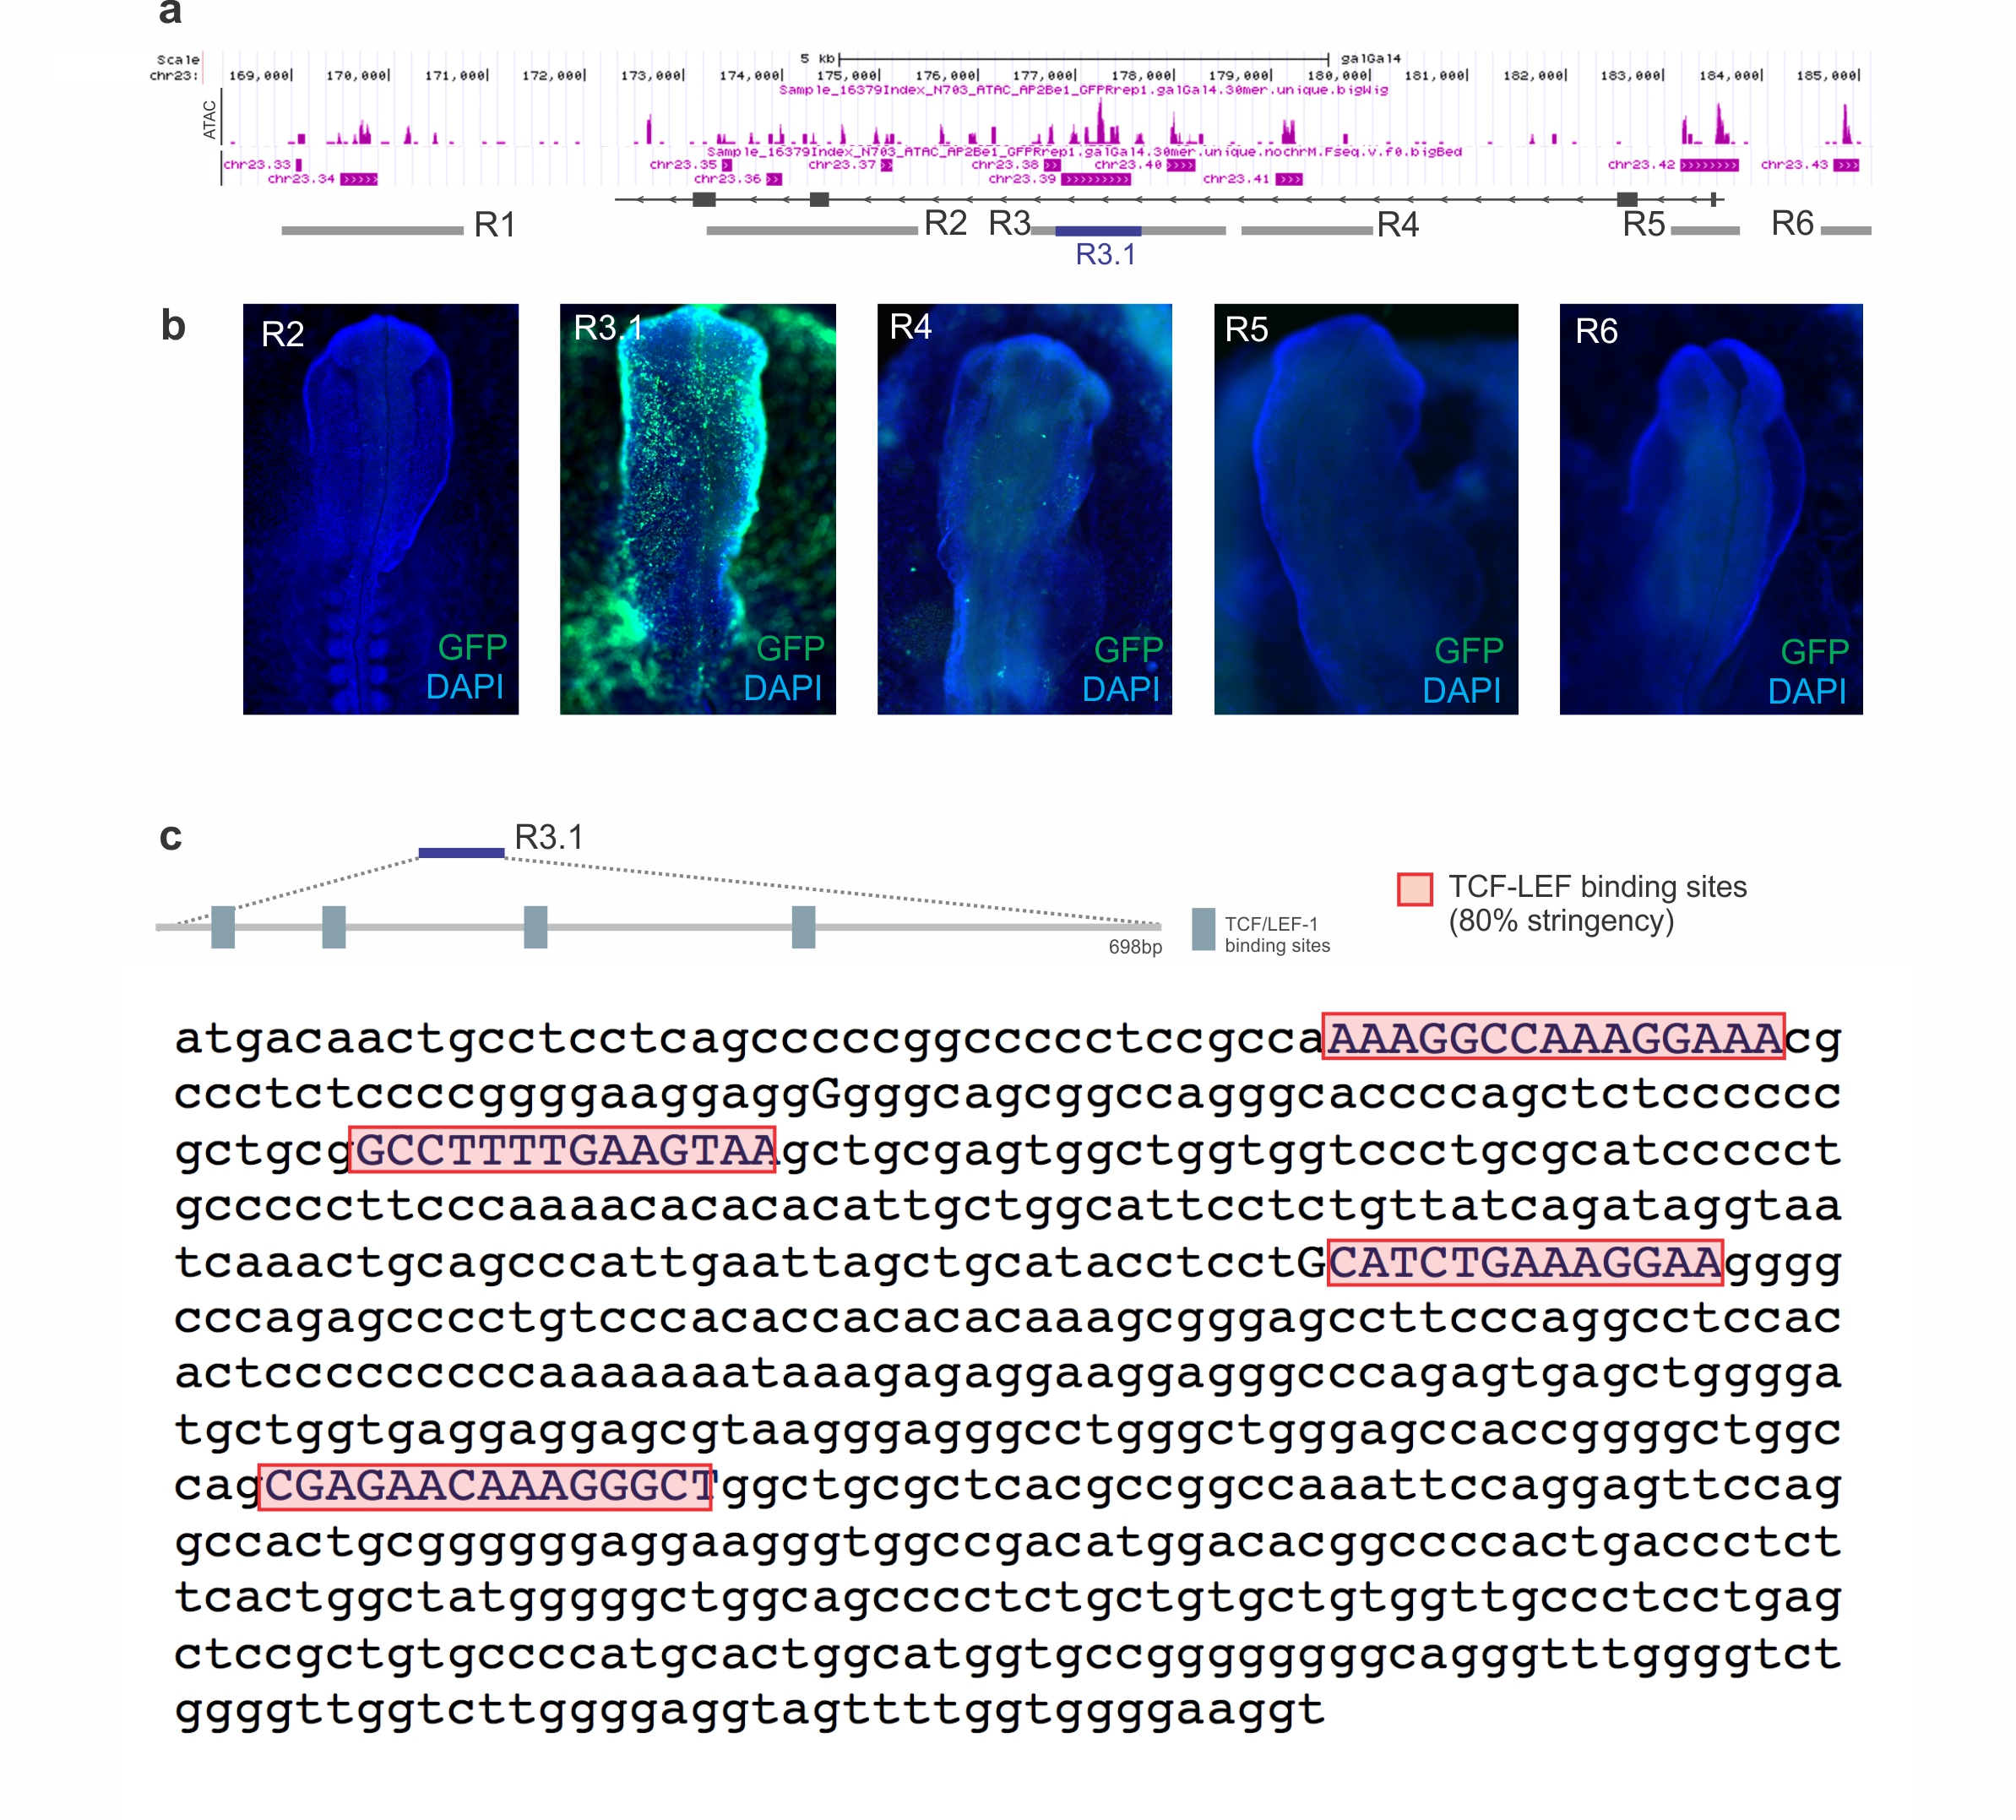

Supplement: supp [file elife-40556-supp-v1.zip › elife_poa_e40556_Figure_5_figure_supplement_1.jpg]

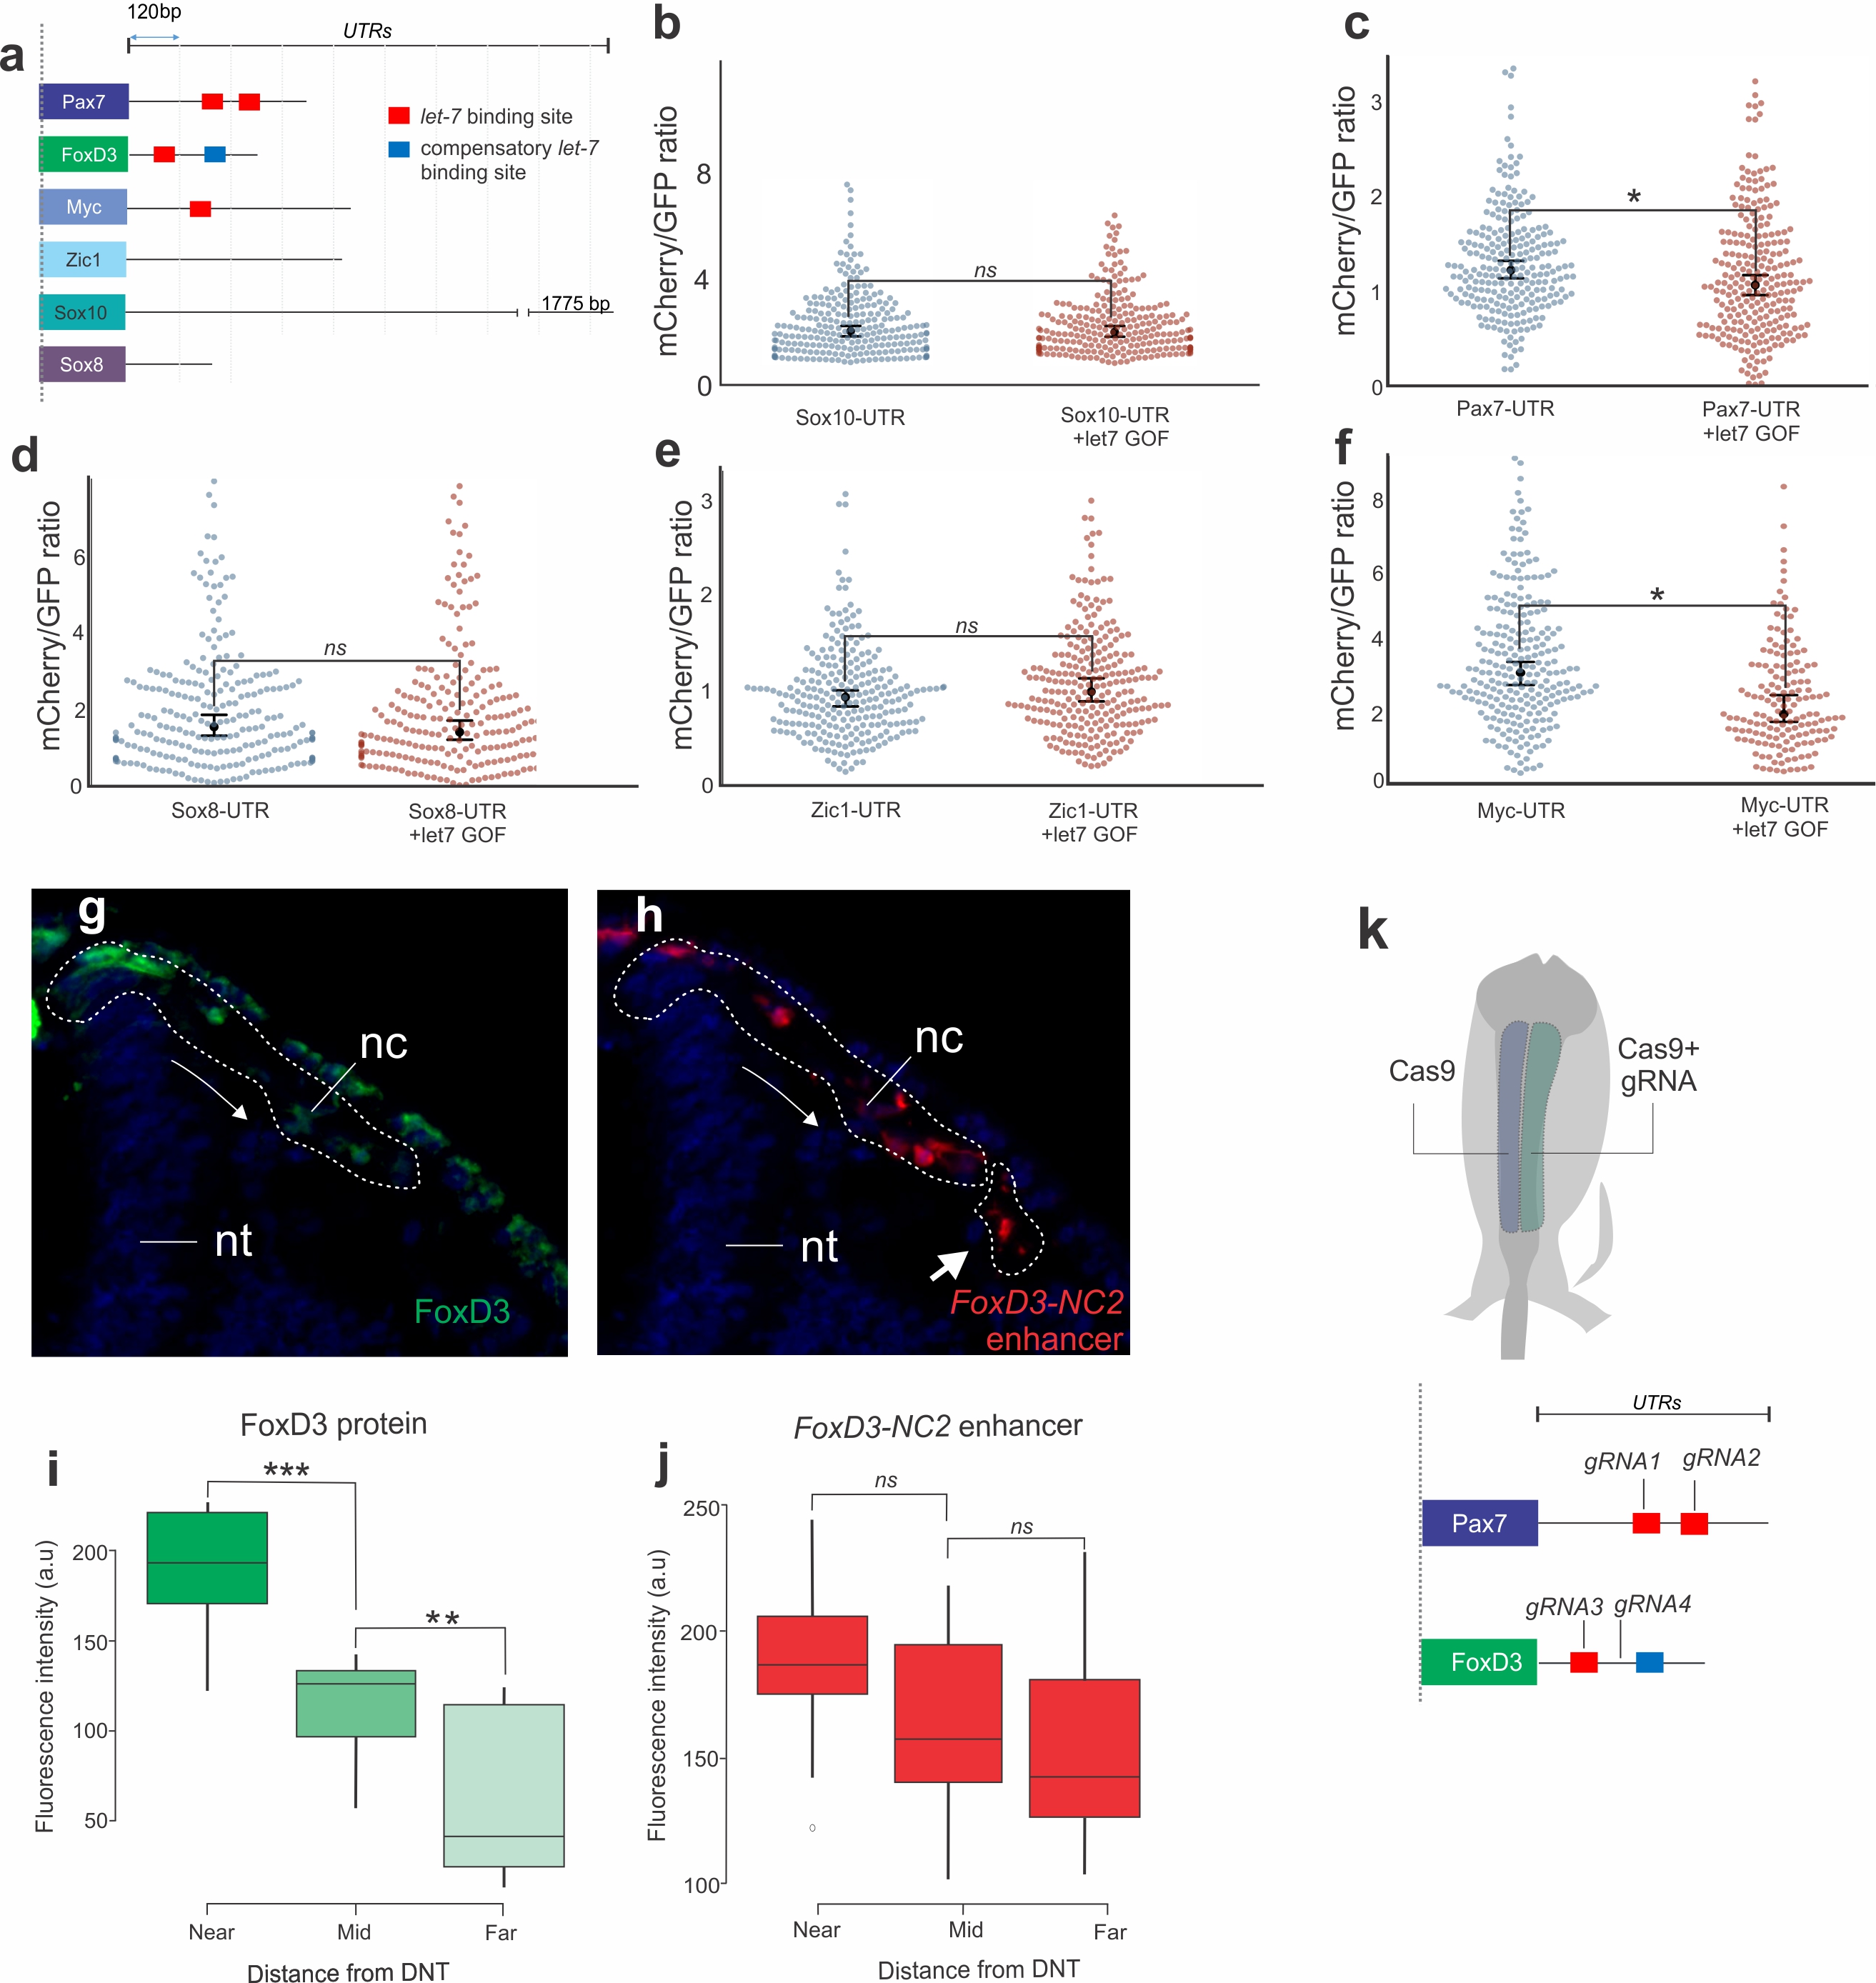

Supplement: supp [file elife-40556-supp-v1.zip › elife_poa_e40556_Figure_4_figure_supplement_1.jpg]

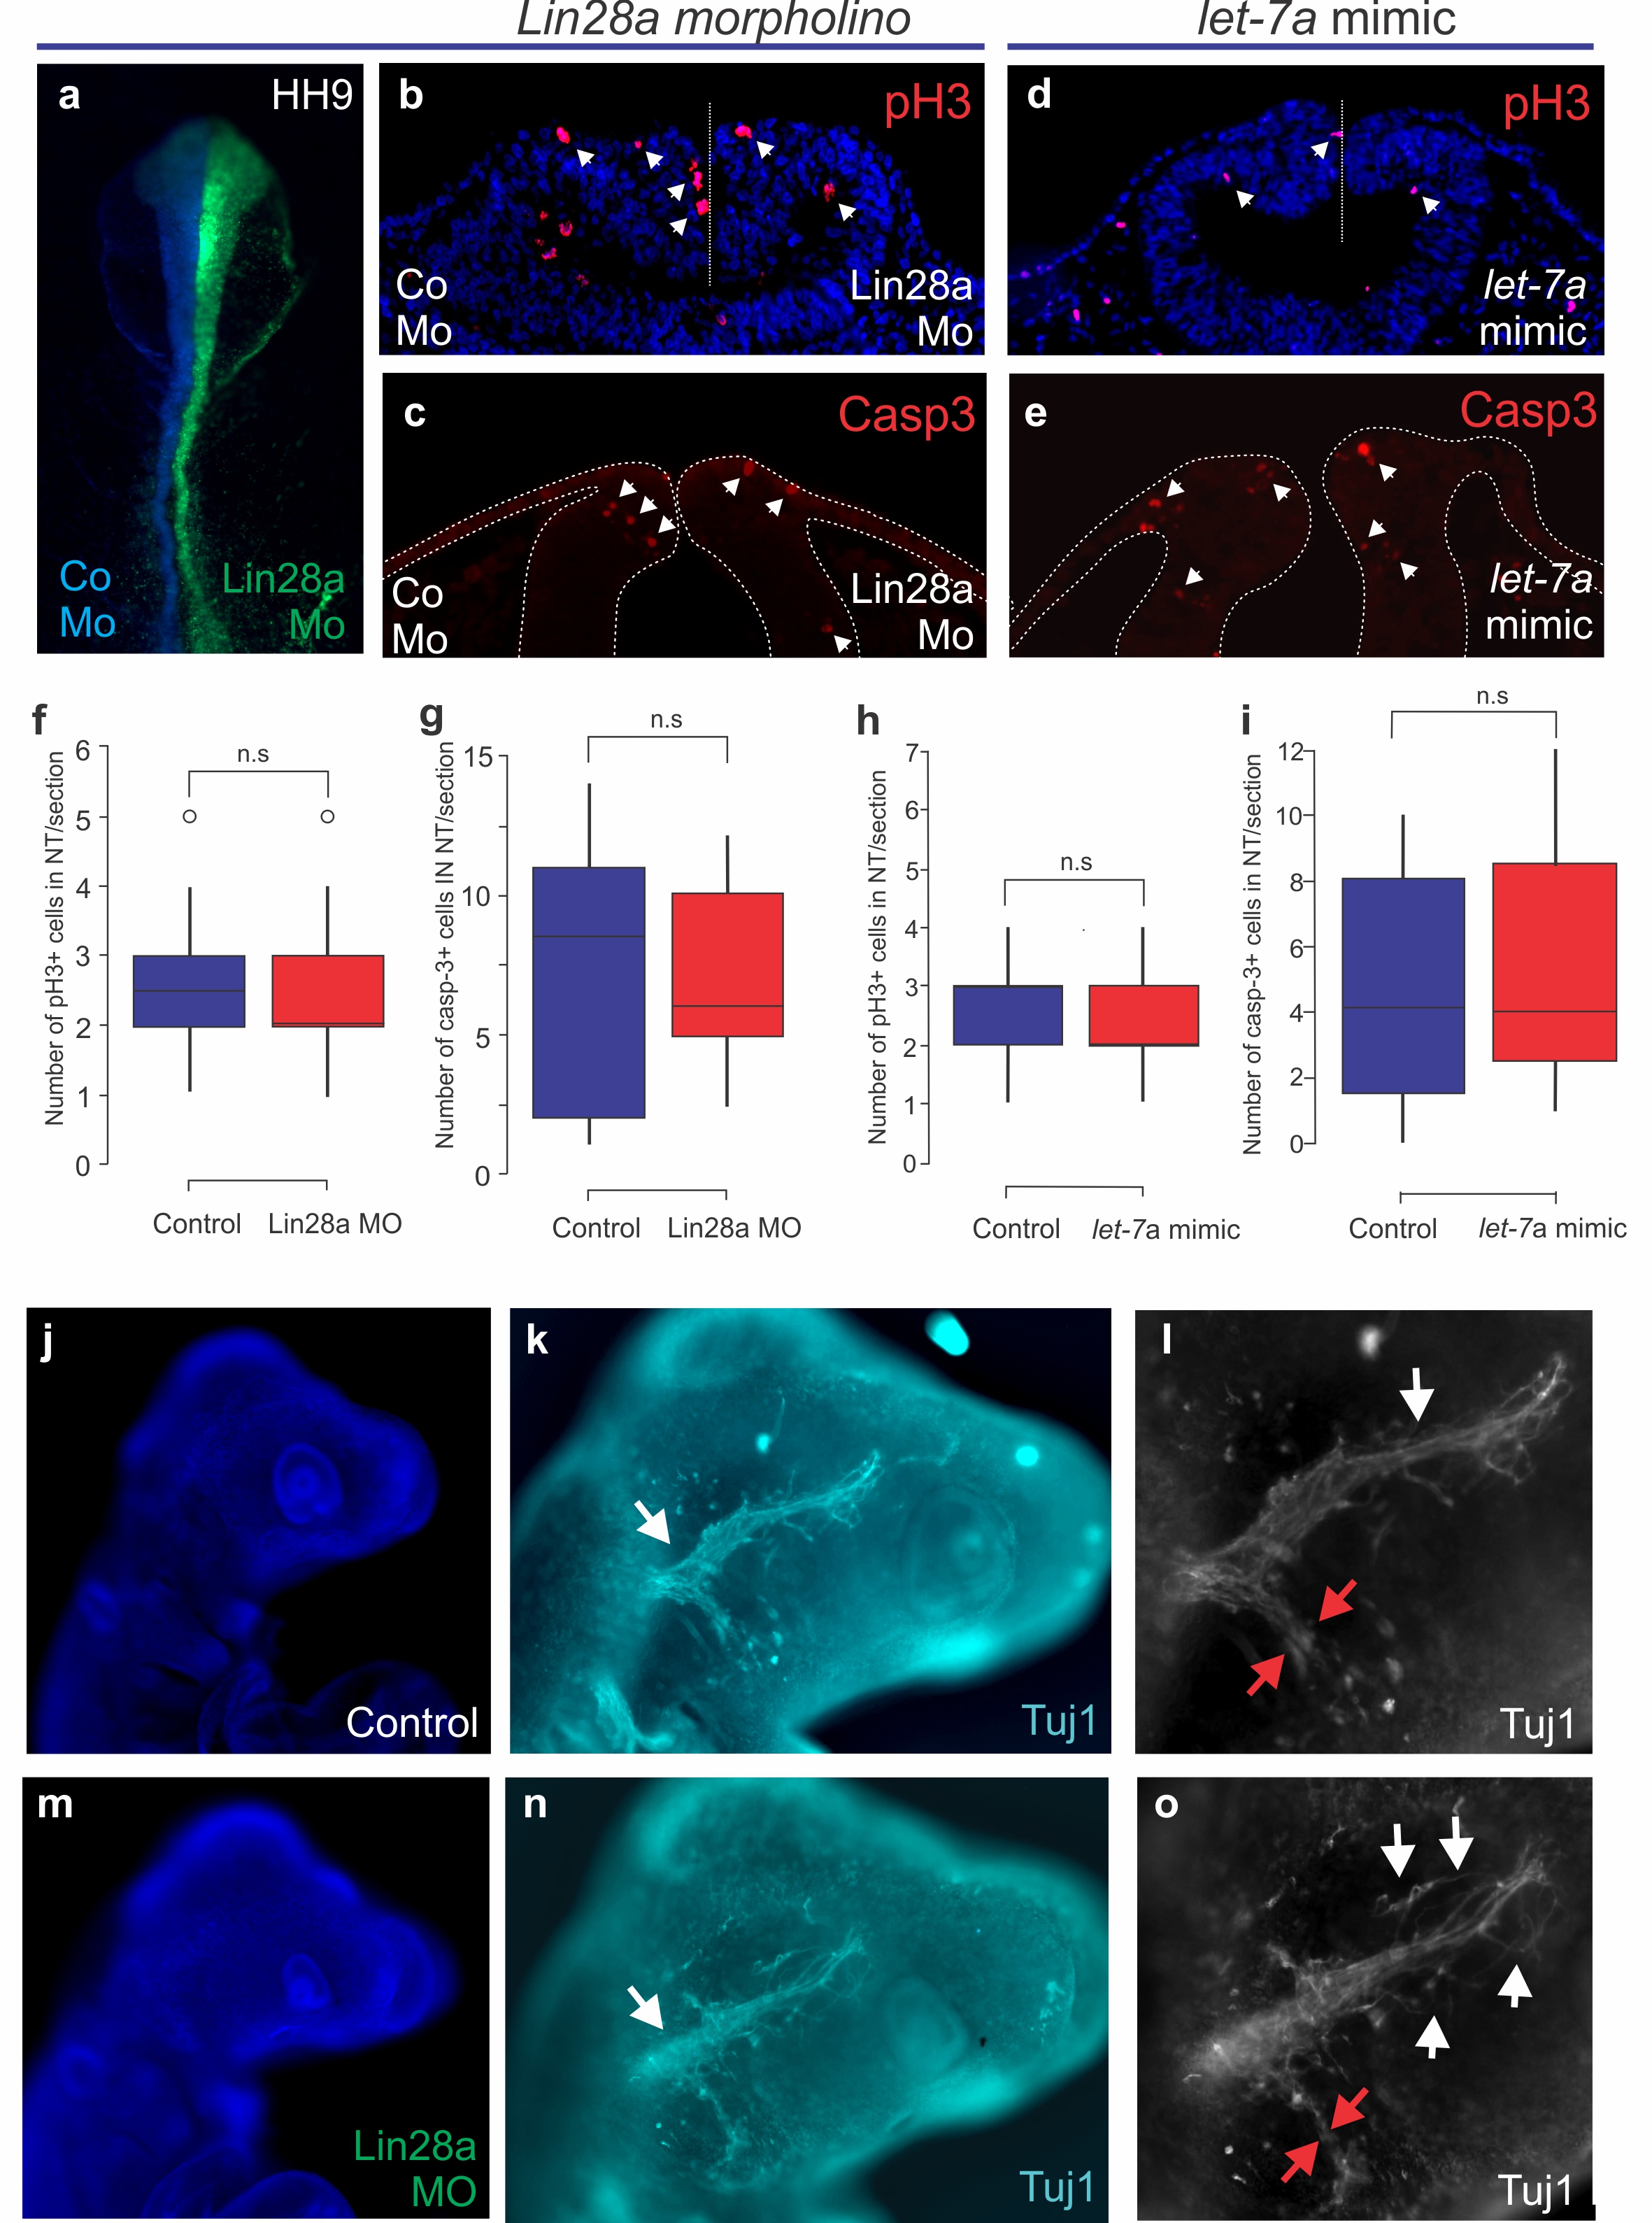

Supplement: supp [file elife-40556-supp-v1.zip › elife_poa_e40556_Figure_1_figure_supplement_4.jpg]
